# Supplementary material
Source: PubMed Central journal article supplement (PMC5565738)
Supplement: NIHMS854625-supplement-10985_2017_9391_MOESM1_ESM.pdf [file NIHMS854625-supplement-10985_2017_9391_MOESM1_ESM.pdf]

# Web-based Supplementary Materials for Modeling Restricted Mean Survival Time under General Censoring Mechanisms

Xin Wang (*vivianwx@umich.edu*)

Douglas E. Schaebel (*deschau@umich.edu*)

Department of Biostatistics, University of Michigan, Ann Arbor, Michigan, 48109-2029, U.S.A.

## Contents

|                                                          |          |
|----------------------------------------------------------|----------|
| <b>A Asymptotic Properties of The Proposed Estimator</b> | <b>2</b> |
| A.1 Notations . . . . .                                  | 2        |
| A.2 Model Assumptions . . . . .                          | 2        |
| A.3 Regularity Conditions . . . . .                      | 3        |
| A.4 Outline of Derivation . . . . .                      | 3        |
| A.5 Unbiased Estimating Equation . . . . .               | 4        |
| A.6 Consistency . . . . .                                | 7        |
| A.7 Asymptotic Distribution . . . . .                    | 8        |
| <b>B Model Selection Criteria</b>                        | <b>8</b> |
| <b>C More Results in Application Data Analysis</b>       | <b>9</b> |

## List of Figures

|                                                                                                                                                                                                            |    |
|------------------------------------------------------------------------------------------------------------------------------------------------------------------------------------------------------------|----|
| 1 Fitted RMST ( $L = 1$ year) by MELD score for a reference patient: white, male, age=50, Region=5, year=2005, not hospitalized, not on dialysis, blood Type=O, BMI $\in (20, 25]$ , sodium=130 . . . . .  | 10 |
| 2 Fitted RMST ( $L = 5$ years) by MELD score for a reference patient: white, male, age=50, Region=5, year=2005, not hospitalized, not on dialysis, blood Type=O, BMI $\in (20, 25]$ , sodium=130 . . . . . | 10 |

## List of Tables

|                                                                                                            |    |
|------------------------------------------------------------------------------------------------------------|----|
| 1 Estimated covariate effects on RMST in the absence of liver transplantation ( $L = 12$ months) . . . . . | 11 |
| 2 Estimated covariate effects on RMST in the absence of liver transplantation ( $L = 60$ months) . . . . . | 12 |

# A Asymptotic Properties of The Proposed Estimator

## A.1 Notations

To begin with, we review the essential notations needed for further discussion:

- $i$ : subject index,  $i \in \{1, \dots, n\}$
- $D_i$ : treatment-free death time
- $T_i$ : dependent censoring time; e.g. treatment
- $C_i$ : independent censoring time; e.g. administrative censoring
- $\tau$ : end of follow up time
- $L$ : pre-specified time point of interest,  $L \leq \tau$
- $X_i = D_i \wedge T_i \wedge C_i$ : observation time
- $Y_i = X_i \wedge L$ : restricted observation time by  $L$
- $\Delta_i = I(D_i \wedge L \leq T_i \wedge C_i)$ : indicator for restricted survival time  $D_i \wedge L$
- $\Delta_i^D = I(D_i \leq T_i \wedge C_i)$ : death indicator
- $\Delta_i^T = I(T_i < D_i \wedge C_i)$ : dependent censoring indicator
- $\Delta_i^C = I(C_i < D_i \wedge T_i)$ : independent censoring indicator
- $\mathbf{Z}_i^D(t)$ : time-dependent covariates that predict death  $D_i$
- $\mathbf{Z}_i^T(t)$ : time-dependent covariates that predict dependent censoring  $T_i$
- $\mathbf{Z}_i^C$ : baseline covariates that predict independent censoring  $C_i$
- $\mathbf{Z}_i(t)$ : a covariate set that stacks  $\mathbf{Z}_i^D(t), \mathbf{Z}_i^T(t), \mathbf{Z}_i^C$  together and removes redundancy
- $\tilde{\mathbf{Z}}_i(t) = \{\mathbf{Z}_i(u) : 0 \leq u \leq t\}$ : observation history of all the covariates up to time  $t$
- $\lambda_i^T(t)$ : hazard rate for dependent censoring  $T_i$
- $\lambda_i^C(t)$ : hazard rate for independent censoring  $C_i$
- $\Lambda_i^T(t) = \int_0^t \lambda_i^T(u) du$ : cumulative hazard rate for dependent censoring  $T_i$
- $\Lambda_i^C(t) = \int_0^t \lambda_i^C(u) du$ : cumulative hazard rate for independent censoring  $C_i$
- $N_i^D(t) = I(X_i \leq t, \Delta_i^D = 1)$ : counting process for death
- $N_i^T(t) = I(X_i \leq t, \Delta_i^T = 1)$ : counting process for dependent censoring
- $N_i^C(t) = I(X_i \leq t, \Delta_i^C = 1)$ : counting process for independent censoring
- $R_i(t) = I(X_i \geq t)$ : at risk process
- $dM_i^T(t) = dN_i^T(t) - R_i(t)d\Lambda_i^T(t)$ : zero mean process for dependent censoring
- $dM_i^C(t) = dN_i^C(t) - R_i(t)d\Lambda_i^C(t)$ : zero mean process for independent censoring

## A.2 Model Assumptions

We have made these assumptions in our paper:

- (a) Assume restricted mean lifetime conditional on baseline covariates  $\mu_i(L) := E\{D_i \wedge L | \mathbf{Z}_i^D(0)\}$  follows the model structure as below,

$$g[\mu_i(L)] \equiv g\left[E\left\{D_i \wedge L | \mathbf{Z}_i^D(0)\right\}\right] = \beta_D' \mathbf{Z}_i^D(0),$$

where  $g(*)$  is a given smooth and strictly monotone link function and  $\beta_D$  is of our primary interest.

- (b) Assume Cox proportional hazards model for dependent and independent censoring time  $T_i$  and  $C_i$ :

$$\begin{aligned} \lambda_i^T(t) &= \lambda_0^T(t) \exp\left\{\beta_T' \mathbf{Z}_i^T(t)\right\}, \\ \lambda_i^C(t) &= \lambda_0^C(t) \exp\left(\beta_C' \mathbf{Z}_i^C\right). \end{aligned}$$

- (c) Assume no unmeasured confounders for dependent censoring  $T_i$ : for any  $t > 0$ ,

$$\lim_{h \rightarrow 0} \frac{P\left\{X_i \in [t, t+h), \Delta_i^T = 1 | X_i \geq t, \tilde{\mathbf{Z}}_i(t), D_i\right\}}{h} = \lim_{h \rightarrow 0} \frac{P\left\{X_i \in [t, t+h), \Delta_i^T = 1 | X_i \geq t, \tilde{\mathbf{Z}}_i(t)\right\}}{h}.$$

- (d) Assume independent censoring time is independent of either death time or dependent censoring time given baseline covariates; i.e.,

$$C_i \perp T_i | \mathbf{Z}_i(0), C_i \perp D_i | \mathbf{Z}_i(0).$$

### A.3 Regularity Conditions

We specify the necessary regularity conditions (i)-(vii) as below.

- (i)  $\{X_i, \Delta_i^D, \Delta_i^T, \Delta_i^C, \tilde{\mathbf{Z}}_i(X_i)\}$ ,  $i = 1, \dots, n$  are independently and identically distributed.
- (ii)  $P(R_i(t) = 1) > 0$  for  $t \in (0, \tau]$ ,  $i = 1, \dots, n$ .
- (iii)  $|Z_{ik}(0)| + \int_0^\tau d|Z_{ik}(t)| < M_Z < \infty$  for  $i = 1, \dots, n$ , where  $Z_{ik}(t)$  are the  $k$ th components of  $\mathbf{Z}_i(t)$ .
- (iv)  $\Lambda_i^T(\tau) < \infty$ ,  $\Lambda_i^C(\tau) < \infty$  and  $\Lambda_i^T(t), \Lambda_i^C(t)$  are absolutely continuous for  $t \in (0, \tau]$ .
- (v) There exist neighborhoods  $\mathcal{B}_T$  of  $\beta_T$  and  $\mathcal{B}_C$  of  $\beta_C$  such that for  $k = 0, 1, 2$ ,

$$\sup_{t \in (0, \tau], \beta \in \mathcal{B}_T} \left\| \frac{1}{n} \sum_{i=1}^n \exp \left\{ \beta' \mathbf{Z}_i^T(t) \right\} R_i(t) \mathbf{Z}_i^T(t)^{\otimes k} - \mathbf{r}_T^{(k)}(t; \beta) \right\| \xrightarrow{p} 0,$$

$$\sup_{t \in (0, \tau], \beta \in \mathcal{B}_C} \left\| \frac{1}{n} \sum_{i=1}^n \exp \left( \beta' \mathbf{Z}_i^C \right) R_i(t) \mathbf{Z}_i^{C \otimes k} - \mathbf{r}_C^{(k)}(t; \beta) \right\| \xrightarrow{p} 0,$$

where  $\mathbf{v}^{\otimes 0} = 1$ ,  $\mathbf{v}^{\otimes 1} = \mathbf{v}$ ,  $\mathbf{v}^{\otimes 2} = \mathbf{v}'\mathbf{v}$  and

$$\mathbf{r}_T^{(k)}(t; \beta) = E \left[ \exp \left\{ \beta' \mathbf{Z}_i^T(t) \right\} R_i(t) \mathbf{Z}_i^T(t)^{\otimes k} \right], \quad (1)$$

$$\mathbf{r}_C^{(k)}(t; \beta) = E \left\{ \exp \left( \beta' \mathbf{Z}_i^C \right) R_i(t) \mathbf{Z}_i^{C \otimes k} \right\}. \quad (2)$$

- (vi) Define  $h(x) = \partial g^{-1}(x) / \partial x$ , where  $h$  exists and is continuous in an open neighborhood  $\mathcal{B}_D$  of  $\beta_D$ .
- (vii) The matrices  $\mathbf{A}(\beta_D)$ ,  $\mathbf{\Omega}_T(\beta_T)$ ,  $\mathbf{\Omega}_C(\beta_C)$  are each positive definite, where

$$\mathbf{A}(\beta) = E \left[ \mathbf{Z}_i^D(0)^{\otimes 2} h \left\{ \beta'_D \mathbf{Z}_i^D(0) \right\} \right], \quad (3)$$

$$\mathbf{\Omega}_T(\beta) = E \left[ \int_0^\tau \left\{ \frac{\mathbf{r}_T^{(2)}(t; \beta)}{r_T^{(0)}(t; \beta)} - \bar{\mathbf{z}}_T(t; \beta)^{\otimes 2} \right\} dN_i^T(t) \right], \quad (4)$$

$$\mathbf{\Omega}_C(\beta) = E \left[ \int_0^\tau \left\{ \frac{\mathbf{r}_C^{(2)}(t; \beta)}{r_C^{(0)}(t; \beta)} - \bar{\mathbf{z}}_C(t; \beta)^{\otimes 2} \right\} dN_i^C(t) \right], \quad (5)$$

and

$$\bar{\mathbf{z}}_T(t; \beta) = \frac{\mathbf{r}_T^{(1)}(t; \beta)}{r_T^{(0)}(t; \beta)}, \quad (6)$$

$$\bar{\mathbf{z}}_C(t; \beta) = \frac{\mathbf{r}_C^{(1)}(t; \beta)}{r_C^{(0)}(t; \beta)}. \quad (7)$$

### A.4 Outline of Derivation

Two estimating equation mentioned in our paper are

$$\mathbf{\Phi}^*(\beta) := \frac{1}{n} \sum_{i=1}^n \mathbf{\Phi}_i^*(\beta) := \frac{1}{n} \sum_{i=1}^n \Delta_i W_i(Y_i) \left[ Y_i - g^{-1} \left\{ \beta' \mathbf{Z}_i^D(0) \right\} \right] \mathbf{Z}_i^D(0) = \mathbf{0}, \quad (8)$$

where  $W_i(t) = W_i^T(t)W_i^C(t)$ ,  $W_i^T(t) = \exp\{\Lambda_i^T(t)\}$  and  $W_i^C(t) = \exp\{\Lambda_i^C(t)\}$ , and

$$\mathbf{\Phi}(\beta) := \frac{1}{n} \sum_{i=1}^n \mathbf{\Phi}_i(\beta) := \frac{1}{n} \sum_{i=1}^n \Delta_i \widehat{W}_i(Y_i) \left[ Y_i - g^{-1} \left\{ \beta' \mathbf{Z}_i^D(0) \right\} \right] \mathbf{Z}_i^D(0) = \mathbf{0}, \quad (9)$$

where  $\widehat{W}_i(t) = \widehat{W}_i^T(t)\widehat{W}_i^C(t)$ ,  $\widehat{W}_i^T(t) = \exp\{\widehat{\Lambda}_i^T(t)\}$  and  $\widehat{W}_i^C(t) = \exp\{\widehat{\Lambda}_i^C(t)\}$ .

We will first show (8) is unbiased, and then (9) satisfies that  $\sqrt{n}\Phi(\beta_D)$  converges to a zero-mean Normal with variance  $\mathbf{B}(\beta_D) = E\{\mathbf{B}_i(\beta_D)^{\otimes 2}\}$ , where

$$\mathbf{B}(\beta_D) = E\{\mathbf{B}_i(\beta_D)^{\otimes 2}\}, \quad (10)$$

$$\begin{aligned} \mathbf{B}_i(\beta) &= \boldsymbol{\epsilon}_i(\beta) + \mathbf{K}_T(\beta)\boldsymbol{\Omega}_T(\beta_T)^{-1}\mathbf{U}_i^T(\beta_T) + \int_0^L \mathbf{H}_T(u; \beta)r_T^{(0)}(u; \beta_T)^{-1}dM_i^T(u) \\ &\quad + \mathbf{K}_C(\beta)\boldsymbol{\Omega}_C(\beta_C)^{-1}\mathbf{U}_i^C(\beta_C) + \int_0^L \mathbf{H}_C(u; \beta)r_C^{(0)}(u; \beta_C)^{-1}dM_i^C(u), \end{aligned} \quad (11)$$

$$\boldsymbol{\epsilon}_i(\beta) = \Delta_i W_i(Y_i) [Y_i - g^{-1}\{\beta' \mathbf{Z}_i^D(0)\}] \mathbf{Z}_i^D(0), \quad (12)$$

$$\mathbf{U}_i^T(\beta_T) = \int_0^t \{\mathbf{Z}_i^T(u) - \bar{z}_T(u; \beta_T)\} dM_i^T(u), \quad (13)$$

$$\mathbf{U}_i^C(\beta_C) = \int_0^t \{\mathbf{Z}_i^C(u) - \bar{z}_C(u; \beta_C)\} dM_i^C(u), \quad (14)$$

$$\mathbf{K}_T(\beta) = E\{\boldsymbol{\epsilon}_j(\beta) \mathbf{D}_i^T(Y_i)'\}, \quad (15)$$

$$\mathbf{K}_C(\beta) = E\{\boldsymbol{\epsilon}_j(\beta) \mathbf{D}_i^C(Y_i)'\}, \quad (16)$$

$$\mathbf{H}_T(t; \beta) = E\{\boldsymbol{\epsilon}_j(\beta) \exp\{\beta'_T \mathbf{Z}_i^T(t)\} R_i(t)\}, \quad (17)$$

$$\mathbf{H}_C(t; \beta) = E\{\boldsymbol{\epsilon}_j(\beta) \exp\{\beta'_C \mathbf{Z}_i^C(t)\} R_i(t)\}, \quad (18)$$

$$\mathbf{D}_i^T(t) = \int_0^t \{\mathbf{Z}_i^T(u) - \bar{z}_T(u; \beta_T)\} d\Lambda_i^T(u), \quad (19)$$

$$\mathbf{D}_i^C(t) = \int_0^t \{\mathbf{Z}_i^C(u) - \bar{z}_C(u; \beta_C)\} d\Lambda_i^C(u), \quad (20)$$

for any subject  $i = 1, \dots, n$ , and  $\boldsymbol{\Omega}_T(\beta), \boldsymbol{\Omega}_C(\beta)$  are already defined in (4) and (5).

Let  $\hat{\beta}_D$  denote the solution to (9). We will show that

- (a) **(Consistency)** as  $n \rightarrow \infty$ ,  $\hat{\beta}_D$  converges in probability to  $\beta_D$ .
- (b) **(Asymptotic Properties)** as  $n \rightarrow \infty$ ,  $\sqrt{n}(\hat{\beta}_D - \beta_D)$  converges to a zero-mean Normal with variance  $\mathbf{A}(\beta_D)^{-1} \mathbf{B}(\beta_D) \mathbf{A}(\beta_D)^{-1}$  with  $\mathbf{A}(\beta)$  and  $\mathbf{B}(\beta)$  defined in (3) and (10).

## A.5 Unbiased Estimating Equation

**Theorem 1** *Under regularity conditions (i)-(vii), the estimating equation (8) is unbiased at the true value of  $\beta_D$ ; i.e.  $E\{\Phi^*(\beta_D)\} = 0$ .*

**Proof 1** *As defined in our paper, the  $i_{th}$  error term in (8) are independently and identically distributed. It would be enough to show that  $E\{\boldsymbol{\epsilon}_i(\beta_D)\} = \mathbf{0}$ . This holds because the conditional expectation on  $\mathbf{Z}_i^D(0)$  is unbiased:*

$$\begin{aligned} &E\left\{\boldsymbol{\epsilon}_i(\beta_D) \mid \mathbf{Z}_i^D(0)\right\} \\ &= \mathbf{Z}_i^D(0) E\left\{W_i(Y_i) \Delta_i Y_i \mid \mathbf{Z}_i^D(0)\right\} - \mathbf{Z}_i^D(0) g^{-1}\left\{\beta'_D \mathbf{Z}_i^D(0)\right\} E\left\{W_i(Y_i) \Delta_i \mid \mathbf{Z}_i^D(0)\right\} \\ &= \mathbf{Z}_i^D(0) E\left[E\left\{W_i(Y_i) \Delta_i Y_i \mid D_i\right\} \mid \mathbf{Z}_i^D(0)\right] - \mathbf{Z}_i^D(0) g^{-1}\left\{\beta'_D \mathbf{Z}_i^D(0)\right\} E\left[E\left\{W_i(Y_i) \Delta_i \mid D_i\right\} \mid \mathbf{Z}_i^D(0)\right] \\ &= \mathbf{Z}_i^D(0) E\left[E\left\{\frac{I(T_i \geq D_i \wedge L, C_i \geq D_i \wedge L)}{P(T_i \geq D_i \wedge L, C_i \geq D_i \wedge L)} (D_i \wedge L) \mid D_i\right\} \mid \mathbf{Z}_i^D(0)\right] \\ &\quad - \mathbf{Z}_i^D(0) g^{-1}\left\{\beta'_D \mathbf{Z}_i^D(0)\right\} E\left[E\left\{\frac{I(T_i \geq D_i \wedge L, C_i \geq D_i \wedge L)}{P(T_i \geq D_i \wedge L, C_i \geq D_i \wedge L)} \mid D_i\right\} \mid \mathbf{Z}_i^D(0)\right] \\ &= \mathbf{Z}_i^D(0) E\left\{D_i \wedge L \mid \mathbf{Z}_i^D(0)\right\} - \mathbf{Z}_i^D(0) g^{-1}\left\{\beta'_D \mathbf{Z}_i^D(0)\right\} \\ &= \mathbf{0}. \end{aligned}$$

Then averaging over the baseline covariates,  $E\{\boldsymbol{\epsilon}_i(\beta_D)\}$  and therefore  $E\{\Phi^*(\beta_D)\}$  will be  $\mathbf{0}$ .

**Theorem 2** Under regularity conditions (i)-(vii), as  $n \rightarrow \infty$ ,  $\sqrt{n}\Phi(\beta_D)$  converges to a zero-mean Normal with variance  $\mathbf{B}(\beta_D)$  defined in (10).

**Proof 2** As shown in Zhang and Schaebel (2011), the weight involved with dependent censoring time  $T_i$  can be written as

$$\sqrt{n} \left\{ \widehat{W}_i^T(t) - W_i^T(t) \right\} = \frac{1}{\sqrt{n}} W_i^T(t) \left\{ \mathbf{D}_i^T(t)' \boldsymbol{\Omega}_T(\beta_T)^{-1} \sum_{j=1}^n \mathbf{U}_j^T(\beta_T) + \sum_{j=1}^n J_{ij}^T(t) \right\} + o_p(1),$$

with defined  $\mathbf{D}_i^T(t), \mathbf{U}_i^T(\beta_T), \boldsymbol{\Omega}_T(\beta), \mathbf{r}_T^{(k)}(t), \bar{z}_T(t; \beta)$  in (19), (13), (4), (1), (6) and

$$J_{ij}^T(t) = \int_0^t \exp \left\{ \beta_T' \mathbf{Z}_i^T(u) \right\} R_i(u) r_T^{(0)}(u; \beta_T)^{-1} dM_j^T(u).$$

And we can derive the similar formula for independent censoring time  $C_i$ ,

$$\sqrt{n} \left\{ \widehat{W}_i^C(t) - W_i^C(t) \right\} = \frac{1}{\sqrt{n}} W_i^C(t) \left\{ \mathbf{D}_i^C(t)' \boldsymbol{\Omega}_C(\beta_C)^{-1} \sum_{j=1}^n \mathbf{U}_j^C(\beta_C) + \sum_{j=1}^n J_{ij}^C(t) \right\} + o_p(1),$$

with defined  $\mathbf{D}_i^C(t), \mathbf{U}_i^C(\beta_C), \boldsymbol{\Omega}_C(\beta), \mathbf{r}_C^{(k)}(t), \bar{z}_C(t; \beta)$  in (20), (14), (5), (2), (7) and

$$J_{ij}^C(t) = \int_0^t \exp \left( \beta_C' \mathbf{Z}_i^C(u) \right) R_i(u) r_C^{(0)}(u; \beta_C)^{-1} dM_j^C(u).$$

Rewrite the target vector as

$$\begin{aligned} \sqrt{n}\Phi(\beta) &= \frac{1}{\sqrt{n}} \sum_{i=1}^n \Delta_i(Y_i) [Y_i - g^{-1}\{\beta' \mathbf{Z}_i^D(0)\}] \mathbf{Z}_i^D(0) \widehat{W}_i^T(Y_i) \widehat{W}_i^C(Y_i) \\ &= \frac{1}{\sqrt{n}} \sum_{i=1}^n \Delta_i(Y_i) [Y_i - g^{-1}\{\beta' \mathbf{Z}_i^D(0)\}] \mathbf{Z}_i^D(0) [W_i^T(Y_i) W_i^C(Y_i) \end{aligned} \quad (21)$$

$$+ W_i^C(Y_i) \left\{ \widehat{W}_i^T(Y_i) - W_i^T(Y_i) \right\} \quad (22)$$

$$+ W_i^T(Y_i) \left\{ \widehat{W}_i^C(Y_i) - W_i^C(Y_i) \right\} \quad (23)$$

$$+ \left\{ \widehat{W}_i^C(Y_i) - W_i^C(Y_i) \right\} \left\{ \widehat{W}_i^T(Y_i) - W_i^T(Y_i) \right\} \quad (24)$$

- The first part (21) is just

$$(21) = \frac{1}{\sqrt{n}} \sum_{i=1}^n \boldsymbol{\epsilon}_i(\beta)$$

where  $\boldsymbol{\epsilon}_i(\beta)$  was defined in (12).

- The second part (22) involves the difference between estimated and true IPCW weights for  $T$ :

$$\begin{aligned} (22) &= \frac{1}{\sqrt{n}} \sum_{i=1}^n \boldsymbol{\epsilon}_i(\beta) \left\{ \widehat{W}_i^T(Y_i) - W_i^T(Y_i) \right\} \\ &= \frac{1}{n^{1.5}} \sum_{i=1}^n \boldsymbol{\epsilon}_i(\beta) \left\{ \mathbf{D}_i^T(Y_i)' \boldsymbol{\Omega}_T(\beta_T)^{-1} \sum_{j=1}^n \mathbf{U}_j^T(\beta_T) + \sum_{j=1}^n J_{ij}^T(Y_i) \right\} + o_p(1) \\ &= \frac{1}{n^{1.5}} \sum_{i=1}^n \sum_{j=1}^n \boldsymbol{\epsilon}_i(\beta) \mathbf{D}_i^T(Y_i)' \boldsymbol{\Omega}_T(\beta_T)^{-1} \mathbf{U}_j^T(\beta_T) \end{aligned} \quad (25)$$

$$+ \frac{1}{n^{1.5}} \sum_{i=1}^n \sum_{j=1}^n \boldsymbol{\epsilon}_i(\beta) J_{ij}^T(Y_i) + o_p(1) \quad (26)$$

Eq. (25) is simplified as

$$\begin{aligned}
(25) &= \frac{1}{n^{1.5}} \sum_{i=1}^n \sum_{j=1}^n \epsilon_i(\beta) \mathbf{D}_i^T(Y_i)' \boldsymbol{\Omega}_T(\beta_T)^{-1} \mathbf{U}_j^T(\beta_T) \\
&= \frac{1}{\sqrt{n}} \sum_{j=1}^n \left\{ \frac{1}{n} \sum_{i=1}^n \epsilon_i(\beta) \mathbf{D}_i^T(Y_i)' \right\} \boldsymbol{\Omega}_T(\beta_T)^{-1} \mathbf{U}_j^T(\beta_T)
\end{aligned}$$

where  $\mathbf{K}_T(\beta) = E\{\epsilon_i(\beta) \mathbf{D}_i^T(Y_i)'\}$  was defined in (15), then

$$(25) = \frac{1}{\sqrt{n}} \mathbf{K}_T(\beta) \boldsymbol{\Omega}_T(\beta_T)^{-1} \sum_{j=1}^n \mathbf{U}_j^T(\beta_T)$$

Since  $J_{ij}^T(Y_i)$  can be written as

$$\begin{aligned}
J_{ij}^T(Y_i) &= \int_0^{Y_i} \exp\{\beta'_T \mathbf{Z}_i^T(u)\} R_i(u) r_T^{(0)}(u; \beta_T)^{-1} dM_j^T(u) \\
&= \int_0^L \exp\{\beta'_T \mathbf{Z}_i^T(u)\} I(X_i \geq u) I(X_i \wedge L \geq u) r_T^{(0)}(u; \beta_T)^{-1} dM_j^T(u) \\
&= \int_0^L \exp\{\beta'_T \mathbf{Z}_i^T(u)\} I(X_i \geq u) r_T^{(0)}(u; \beta_T)^{-1} dM_j^T(u) \\
&\equiv \int_0^L \exp\{\beta'_T \mathbf{Z}_i^T(u)\} R_i(u) r_T^{(0)}(u; \beta_T)^{-1} dM_j^T(u),
\end{aligned}$$

Eq. (26) is simplified as

$$\begin{aligned}
(26) &= \frac{1}{n^{1.5}} \sum_{i=1}^n \sum_{j=1}^n \epsilon_i(\beta) \left[ \int_0^L \exp\{\beta'_T \mathbf{Z}_i^T(u)\} R_i(u) r_T^{(0)}(u; \beta_T)^{-1} dM_j^T(u) \right] \\
&= \frac{1}{\sqrt{n}} \int_0^L \left[ \frac{1}{n} \sum_{i=1}^n \epsilon_i(\beta) \exp\{\beta'_T \mathbf{Z}_i^T(u)\} R_i(u) \right] r_T^{(0)}(u; \beta_T)^{-1} \left\{ d \sum_{j=1}^n M_j^T(u) \right\}.
\end{aligned}$$

where  $\mathbf{H}_T(u; \beta) = E\{\epsilon_i(\beta) \exp\{\beta'_T \mathbf{Z}_i^T(u)\} R_i(u)\}$  was defined in (17), then

$$(26) = \frac{1}{\sqrt{n}} \sum_{i=1}^n \int_0^L \mathbf{H}_T(u; \beta) r_T^{(0)}(u; \beta_T)^{-1} dM_i^T(u).$$

To sum up, (22) can be rewritten as:

$$(22) = \frac{1}{\sqrt{n}} \sum_{i=1}^n \left[ \mathbf{K}_T(\beta) \boldsymbol{\Omega}_T(\beta_T)^{-1} \mathbf{U}_i^T(\beta_T) + \int_0^L \mathbf{H}_T(u; \beta) r_T^{(0)}(u; \beta_T)^{-1} dM_i^T(u) \right] + \mathbf{o}_p(1).$$

- Similarly, (23) can be rewritten as:

$$(23) = \frac{1}{\sqrt{n}} \sum_{i=1}^n \left[ \mathbf{K}_C(\beta) \boldsymbol{\Omega}_C(\beta_C)^{-1} \mathbf{U}_i^C(\beta_C) + \int_0^L \mathbf{H}_C(u; \beta) r_C^{(0)}(u; \beta_C)^{-1} dM_i^C(u) \right] + \mathbf{o}_p(1).$$

where  $\mathbf{K}_C(\beta) = E\{\epsilon_i(\beta) \mathbf{D}_i^C(Y_i)'\}$  and  $\mathbf{H}_C(u; \beta) = E\{\epsilon_i(\beta) \exp(\beta'_C \mathbf{Z}_i^C) R_i(u)\}$  were defined in (18).

- Eq. (24) can be rewritten as:

$$\begin{aligned}
(24) &= \frac{1}{\sqrt{n}} \sum_{i=1}^n \Delta_i(Y_i) [Y_i - g^{-1}\{\beta' \mathbf{z}_i^D(0)\}] \mathbf{z}_i^D(0) \{\widehat{W}_i^C(Y_i) - w_i^C(Y_i)\} \{\widehat{W}_i^T(Y_i) - w_i^T(Y_i)\} \\
&= \frac{1}{n^{2.5}} \sum_{i=1}^n \Delta_i(Y_i) [Y_i - g^{-1}\{\beta' \mathbf{z}_i^D(0)\}] \mathbf{z}_i^D(0) w_i^T(Y_i) \left\{ \mathbf{D}_i^T(Y_i)' \boldsymbol{\Omega}_T(\beta_T)^{-1} \sum_{j=1}^n \mathbf{U}_j^T(\beta_T) + \sum_{j=1}^n J_{ij}^T(Y_i) + o_p(\sqrt{n}) \right\} \\
&\quad * w_i^C(Y_i) \left\{ \mathbf{D}_i^C(Y_i)' \boldsymbol{\Omega}_C(\beta_C)^{-1} \sum_{k=1}^n \mathbf{U}_k^C(\beta_C) + \sum_{k=1}^n J_{ik}^C(Y_i) + o_p(\sqrt{n}) \right\} \\
&= \frac{1}{n^{2.5}} \sum_{i=1}^n \epsilon_i(\beta) \left\{ \mathbf{D}_i^T(Y_i)' \boldsymbol{\Omega}_T(\beta_T)^{-1} \sum_{j=1}^n \mathbf{U}_j^T(\beta_T) + \sum_{j=1}^n J_{ij}^T(Y_i) + o_p(\sqrt{n}) \right\} \left\{ \mathbf{D}_i^C(Y_i)' \boldsymbol{\Omega}_C(\beta_C)^{-1} \sum_{k=1}^n \mathbf{U}_k^C(\beta_C) + \sum_{k=1}^n J_{ik}^C(Y_i) + o_p(\sqrt{n}) \right\} \\
&= \frac{1}{n^{2.5}} \sum_{i=1}^n \epsilon_i(\beta) \left\{ \mathbf{D}_i^T(Y_i)' \boldsymbol{\Omega}_T(\beta_T)^{-1} \sum_{j=1}^n \mathbf{U}_j^T(\beta_T) + \sum_{j=1}^n J_{ij}^T(Y_i) \right\} \left\{ \mathbf{D}_i^C(Y_i)' \boldsymbol{\Omega}_C(\beta_C)^{-1} \sum_{k=1}^n \mathbf{U}_k^C(\beta_C) + \sum_{k=1}^n J_{ik}^C(Y_i) \right\} + o_p(1) \\
&= \frac{1}{n^{2.5}} \sum_{i=1}^n \sum_{j=1}^n \sum_{k=1}^n \epsilon_i(\beta) \mathbf{D}_i^T(Y_i)' \boldsymbol{\Omega}_T(\beta_T)^{-1} \mathbf{U}_j^T(\beta_T) \mathbf{D}_i^C(Y_i)' \boldsymbol{\Omega}_C(\beta_C)^{-1} \mathbf{U}_k^C(\beta_C) \tag{27}
\end{aligned}$$

$$+ \frac{1}{n^{2.5}} \sum_{i=1}^n \sum_{j=1}^n \sum_{k=1}^n \epsilon_i(\beta) J_{ij}^T(Y_i) \mathbf{D}_i^C(Y_i)' \boldsymbol{\Omega}_C(\beta_C)^{-1} \mathbf{U}_k^C(\beta_C) \tag{28}$$

$$+ \frac{1}{n^{2.5}} \sum_{i=1}^n \sum_{j=1}^n \sum_{k=1}^n \epsilon_i(\beta) \mathbf{D}_i^T(Y_i)' \boldsymbol{\Omega}_T(\beta_T)^{-1} \mathbf{U}_j^T(\beta_T) J_{ik}^C(\beta_C) \tag{29}$$

$$+ \frac{1}{n^{2.5}} \sum_{i=1}^n \sum_{j=1}^n \sum_{k=1}^n \epsilon_i(\beta) J_{ij}^T(Y_i) J_{ik}^C(Y_i) + o_p(1) \tag{30}$$

Eq. (27)-(30) can be shown to be negligible.

To sum up, we can rewrite  $\sqrt{n}\Phi(\beta)$  as

$$n\Phi(\beta) = \frac{1}{\sqrt{n}} \sum_{i=1}^n \mathbf{B}_i(\beta) + o_p(1),$$

where as defined in (11), Since we have defined  $\mathbf{B}(\beta) = E\{\mathbf{B}_i(\beta)^{\otimes 2}\}$  in (10), then we have proven that

$$\sqrt{n}\Phi(\beta_D) \xrightarrow{D} \text{Normal}(\mathbf{0}, \mathbf{B}(\beta_D)),$$

following that the mean of each term in the summation above is  $\mathbf{0}$  at  $\beta_D$ .

## A.6 Consistency

**Theorem 3** Under regularity conditions (i)-(vii), as  $n \rightarrow \infty$ ,  $\widehat{\beta}_D \xrightarrow{p} \beta_D$ .

**Proof 3** We use the Inverse Function Theorem (Foutz, 1977) by verifying the following conditions:

- $\partial\Phi(\beta)/\partial\beta'$  exists and is continuous in an open neighborhood  $\mathcal{B}_D$  of  $\beta_D$ .
- $-n^{-1}\partial\Phi(\beta)/\partial\beta'|_{\beta=\beta_D}$  is positive definite with probability 1 as  $n \rightarrow \infty$ .
- $-n^{-1}\partial\Phi(\beta)/\partial\beta'$  converges in probability to a fixed function uniformly in an open neighborhood  $\mathcal{B}_D$  of  $\beta_D$ .
- Asymptotic unbiasedness of the estimating function:  $-\Phi(\beta_D)/n \xrightarrow{p} \mathbf{0}$ .

We know that

$$\frac{\partial\Phi(\beta)}{\partial\beta'} = - \sum_{i=1}^n \Delta_i \widehat{W}_i^T(Y_i) \widehat{W}_i^C(Y_i) h\{\beta' \mathbf{z}_i^D(0)\} \mathbf{z}_i^D(0)^{\otimes 2}.$$

where  $h(x) = \partial g^{-1}(x)/\partial x$ . We will show that this derivative vector satisfies all the necessary conditions above.

- The first condition here holds because of the regularity condition (vi), which states that  $h$  exists and is continuous in an open neighborhood  $\mathcal{B}_D$  of  $\beta_D$ .

- As to the second condition here, we know

$$\begin{aligned}
& -\frac{1}{n} \frac{\partial \Phi(\beta)}{\partial \beta'} \Big|_{\beta=\beta_D} \\
&= E \left[ \Delta_i W_i^T(Y_i) W_i^C(Y_i) h \left\{ \beta'_D \mathbf{Z}_i^D(0) \right\} \mathbf{Z}_i^D(0)^{\otimes 2} \right] + \mathbf{o}_p(1) \\
&= E \left[ E \left\{ \frac{I(T_i \wedge C_i \geq D_i \wedge L)}{P(T_i \geq D_i \wedge L) P(C_i \geq D_i \wedge L)} \Big| D_i, \mathbf{Z}_i^D(0) \right\} h \left\{ \beta'_D \mathbf{Z}_i^D(0) \right\} \mathbf{Z}_i^D(0)^{\otimes 2} \right] + \mathbf{o}_p(1) \\
&= E \left[ E \left\{ \frac{I(T_i \geq D_i \wedge L) I(C_i \geq D_i \wedge L)}{P(T_i \geq D_i \wedge L) P(C_i \geq D_i \wedge L)} \Big| D_i, \mathbf{Z}_i^D(0) \right\} h \left\{ \beta'_D \mathbf{Z}_i^D(0) \right\} \mathbf{Z}_i^D(0)^{\otimes 2} \right] + \mathbf{o}_p(1) \\
&= E \left[ h \left\{ \beta'_D \mathbf{Z}_i^D(0) \right\} \mathbf{Z}_i^D(0)^{\otimes 2} \right] + \mathbf{o}_p(1) \\
&\equiv \mathbf{A}(\beta).
\end{aligned}$$

where  $\mathbf{A}(\beta)$  is defined as (3). Since we have assumed  $\mathbf{A}(\beta_D)$  is positive definite, the second condition holds here too.

- The third condition holds by the law of large numbers.
- Finally, since we have proven that

$$\sqrt{n} \Phi(\beta_D) \xrightarrow{D} \text{Normal}(0, \mathbf{B}(\beta_D)).$$

The last condition holds by Chebyshev's inequality.

Having verified all the four conditions, we can argue that  $\hat{\beta}_D \xrightarrow{p} \beta_D$  follows from Inverse Function Theorem.

## A.7 Asymptotic Distribution

**Theorem 4** Under regularity conditions (i)-(vii), as  $n \rightarrow \infty$ ,

$$\sqrt{n} (\hat{\beta}_D - \beta_D) \xrightarrow{D} \text{Normal}(\mathbf{0}, \mathbf{A}(\beta_D)^{-1} \mathbf{B}(\beta_D) \mathbf{A}(\beta_D)^{-1}).$$

**Proof 4** Taylor expansion of  $\Phi(\hat{\beta}_D)$  around  $\beta_D$  is:

$$\mathbf{0} = \Phi(\hat{\beta}_D) = \Phi(\beta_D) + \frac{\partial \Phi(\beta)}{\partial \beta} \Big|_{\beta=\tilde{\beta}} (\hat{\beta}_D - \beta_D),$$

where  $\tilde{\beta}$  lies between  $\hat{\beta}_D$  and  $\beta_D$ . So

$$\begin{aligned}
\sqrt{n} (\hat{\beta}_D - \beta_D) &= - \left\{ \frac{\partial \Phi(\beta)}{\partial \beta} \Big|_{\beta=\tilde{\beta}} \right\}^{-1} \sqrt{n} \Phi(\beta_D) \\
&= \left[ -\frac{1}{n} \sum_{i=1}^n \Delta_i \widehat{W}_i(Y_i) \mathbf{Z}_i^D(0)^{\otimes 2} h \left\{ \tilde{\beta}' \mathbf{Z}_i^D(0) \right\} \right]^{-1} \sqrt{n} \Phi(\beta_D) \\
&= \mathbf{A}(\beta_D)^{-1} \sqrt{n} \Phi(\beta_D) + \mathbf{o}_p(1).
\end{aligned}$$

Following Theorem 2, it holds that

$$\sqrt{n} (\hat{\beta}_D - \beta_D) \xrightarrow{D} \text{Normal}(\mathbf{0}, \mathbf{A}(\beta_D)^{-1} \mathbf{B}(\beta_D) \mathbf{A}(\beta_D)^{-1}).$$

## B Model Selection Criteria

We suggest using Concordance Statistics (IOC), Mean Absolute Deviation (MAD) and Mean Squared Deviation (MSD) to select the proper link function. To simplify the notation, we denote  $D_i^L = D_i \wedge L$  and its predicted value as  $\widehat{D}_i^L = g^{-1}\{\beta'_D \mathbf{Z}_i^D(0)\}$ . Due to the occurrence of censoring, we observe  $X_i = D_i^L \wedge T_i \wedge C_i$  for subject  $i$ .



Our version of IOC is adapted from Frank Harrell's formula of concordance (Harrell, 1996; Heagerty, 2005, Uno et al., 2011):

$$\text{IOC} = \frac{\sum_{i=1}^n \sum_{j=1}^n \Delta_i \widehat{W}_i(Y_i) \widehat{W}_j(Y_j) I(Y_i < Y_j, \widehat{D}_i^L < \widehat{D}_j^L)}{\sum_{i=1}^n \sum_{j=1}^n \Delta_i \widehat{W}_i(Y_i) \widehat{W}_j(Y_j) I(Y_i < Y_j)}.$$

It converges to a censoring distribution free quantity  $P(\widehat{D}_i^L < \widehat{D}_j^L | D_i^L < D_j^L)$  because

(i) as to the numerator,

$$\begin{aligned} & \frac{1}{n^2} \Delta_i \widehat{W}_i(Y_i) \widehat{W}_j(Y_j) I(Y_i < Y_j, \widehat{D}_i^L < \widehat{D}_j^L) \\ & \xrightarrow{p} E \left\{ I(D_i^L \leq T_i \wedge C_i) W_i(Y_i) W_j(Y_j) I(Y_i < Y_j) I(\widehat{D}_i^L < \widehat{D}_j^L) \right\} \\ & = E \left\{ I(D_i^L \leq T_i \wedge C_i) W_i(D_i^L) W_j(D_j^L) I(T_j \wedge C_j > D_i^L) I(D_j^L > D_i^L) I(\widehat{D}_i^L < \widehat{D}_j^L) \right\} \\ & = E \left[ E \left\{ \frac{I(T_i \wedge C_i \geq D_i \wedge L) I(T_j \wedge C_j > D_i \wedge L)}{P(T_i \wedge C_i > D_i \wedge L) P(T_j \wedge C_j > D_i \wedge L)} I(D_i^L < D_j^L, \widehat{D}_i^L < \widehat{D}_j^L) \mid \mathbf{Z}_i^D(0), D_i \right\} \right] \\ & \xrightarrow{p} P(D_i^L < D_j^L, \widehat{D}_i^L < \widehat{D}_j^L). \end{aligned}$$

(ii) Similarly, the denominator follows that

$$\frac{1}{n^2} \Delta_i \widehat{W}_i(Y_i) \widehat{W}_j(Y_j) I(Y_i < Y_j) \xrightarrow{p} P(D_i^L < D_j^L).$$

(iii) So

$$\text{IOC} \xrightarrow{p} P(\widehat{D}_i^L < \widehat{D}_j^L | D_i^L < D_j^L).$$

We can also use the similar trick to prove that

$$\begin{aligned} \text{MAD} & := \frac{1}{n} \sum_{i=1}^n \Delta_i \widehat{W}_i(Y_i) \left| Y_i - g^{-1} \left\{ \widehat{\beta}'_D \mathbf{Z}_i^D(0) \right\} \right| \xrightarrow{p} E \left| D_i^L - \widehat{D}_i^L \right|, \\ \text{MSD} & := \frac{1}{n} \sum_{i=1}^n \Delta_i \widehat{W}_i(Y_i) \left[ Y_i - g^{-1} \left\{ \widehat{\beta}'_D \mathbf{Z}_i^D(0) \right\} \right]^2 \xrightarrow{p} E \left[ D_i^L - \widehat{D}_i^L \right]^2. \end{aligned}$$

## C More Results in Application Data Analysis

Below are the plots of RMST within 1 year and 5 years post wait-list for chronic ESLD patients with different MELD scores.

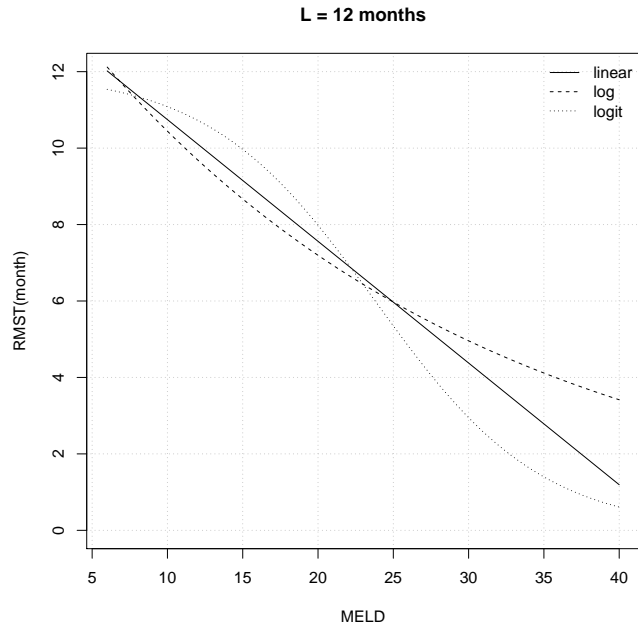

Web Figure 1: Fitted RMST ( $L = 1$  year) by MELD score for a reference patient: white, male, age=50, Region=5, year=2005, not hospitalized, not on dialysis, blood Type=O, BMI  $\in (20, 25]$ , sodium=130

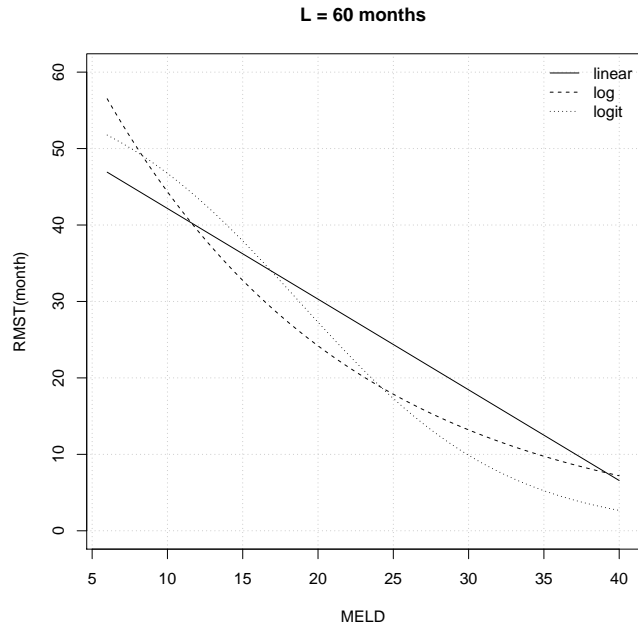

Web Figure 2: Fitted RMST ( $L = 5$  years) by MELD score for a reference patient: white, male, age=50, Region=5, year=2005, not hospitalized, not on dialysis, blood Type=O, BMI  $\in (20, 25]$ , sodium=130

Below are the estimated effects of prognostic factors on pre-transplant survival time within 1 year and 5 year post wait-list for chronic ESLD patients.

Web Table 1: Estimated covariate effects on RMST in the absence of liver transplantation ( $L = 12$  months)

| $Z_i^D(0)$             | Linear                                   |                  |        | Log             |                  |        | Logistic        |                  |        |
|------------------------|------------------------------------------|------------------|--------|-----------------|------------------|--------|-----------------|------------------|--------|
|                        | $\hat{\beta}_D$                          | ASE <sub>1</sub> | $p$    | $\hat{\beta}_D$ | ASE <sub>1</sub> | $p$    | $\hat{\beta}_D$ | ASE <sub>1</sub> | $p$    |
| Intercept              | 12.02                                    | 0.14             | < 0.01 | 2.49            | 0.01             | 0.44   | 3.22            | 0.1              | < 0.01 |
| Year-2005              | 0.1                                      | 0.01             | < 0.01 | 0.01            | < 0.01           | < 0.01 | 0.06            | 0.01             | < 0.01 |
| Age-50 (Years)         | -0.05                                    | < 0.01           | < 0.01 | < 0.01          | < 0.01           | < 0.01 | -0.04           | < 0.01           | < 0.01 |
| Sodium-130 (mmol/l)    | 0.13                                     | 0.01             | < 0.01 | 0.01            | < 0.01           | < 0.01 | 0.08            | < 0.01           | < 0.01 |
| MELD Score-6           | -0.32                                    | < 0.01           | < 0.01 | -0.04           | < 0.01           | < 0.01 | -0.18           | < 0.01           | < 0.01 |
| <u>UNOS Region</u>     | <i>Reference Group: 5</i>                |                  |        |                 |                  |        |                 |                  |        |
| 1                      | -0.32                                    | 0.12             | 0.01   | -0.02           | 0.01             | 0.02   | -0.31           | 0.09             | < 0.01 |
| 2                      | -0.52                                    | 0.09             | < 0.01 | -0.04           | 0.01             | < 0.01 | -0.41           | 0.06             | < 0.01 |
| 3                      | -0.63                                    | 0.12             | < 0.01 | -0.03           | 0.01             | < 0.01 | -0.54           | 0.08             | < 0.01 |
| 4                      | -0.08                                    | 0.08             | 0.29   | < 0.01          | 0.01             | 0.75   | -0.09           | 0.07             | 0.18   |
| 6                      | -0.01                                    | 0.14             | 0.93   | 0.03            | 0.01             | 0.02   | -0.2            | 0.1              | 0.05   |
| 7                      | 0.06                                     | 0.11             | 0.59   | 0.02            | 0.01             | 0.04   | 0.03            | 0.08             | 0.69   |
| 8                      | -0.15                                    | 0.1              | 0.15   | 0.01            | 0.01             | 0.49   | -0.17           | 0.08             | 0.04   |
| 9                      | -0.45                                    | 0.09             | < 0.01 | -0.04           | 0.01             | < 0.01 | -0.27           | 0.08             | < 0.01 |
| 10                     | -0.51                                    | 0.12             | < 0.01 | -0.04           | 0.01             | < 0.01 | -0.47           | 0.09             | < 0.01 |
| 11                     | -0.79                                    | 0.11             | < 0.01 | -0.06           | 0.01             | < 0.01 | -0.59           | 0.08             | < 0.01 |
| <u>Gender</u>          | <i>Reference Group: Male</i>             |                  |        |                 |                  |        |                 |                  |        |
| Female                 | 0.01                                     | 0.05             | 0.88   | -0.01           | < 0.01           | 0.03   | 0.03            | 0.04             | 0.47   |
| <u>Race</u>            | <i>Reference Group: White</i>            |                  |        |                 |                  |        |                 |                  |        |
| Black                  | 0.19                                     | 0.11             | 0.07   | 0.02            | 0.01             | 0.02   | 0.05            | 0.07             | 0.5    |
| Hispanic               | -0.02                                    | 0.07             | 0.76   | < 0.01          | 0.01             | 0.44   | -0.05           | 0.05             | 0.34   |
| Asian                  | 0.2                                      | 0.12             | 0.1    | 0.02            | 0.01             | 0.11   | 0.21            | 0.11             | 0.05   |
| Others                 | -0.29                                    | 0.23             | 0.22   | -0.02           | 0.02             | 0.28   | -0.1            | 0.18             | 0.57   |
| <u>Blood Type</u>      | <i>Reference Group: O</i>                |                  |        |                 |                  |        |                 |                  |        |
| A                      | -0.05                                    | 0.05             | 0.3    | < 0.01          | < 0.01           | 0.44   | < 0.01          | 0.04             | 0.96   |
| B                      | -0.05                                    | 0.09             | 0.57   | -0.01           | 0.01             | 0.46   | 0.01            | 0.06             | 0.89   |
| AB                     | -0.28                                    | 0.21             | 0.19   | -0.03           | 0.01             | 0.04   | -0.23           | 0.15             | 0.13   |
| <u>Diagnosis</u>       | <i>Reference Group: No or Yes</i>        |                  |        |                 |                  |        |                 |                  |        |
| Hepatitis C            | -0.09                                    | 0.09             | 0.32   | < 0.01          | 0.01             | 0.83   | -0.16           | 0.06             | 0.01   |
| Noncholestatic         | 0.29                                     | 0.09             | < 0.01 | 0.04            | 0.01             | < 0.01 | 0.13            | 0.06             | 0.04   |
| Cholestatic            | -0.05                                    | 0.12             | 0.68   | -0.01           | 0.01             | 0.43   | -0.11           | 0.09             | 0.25   |
| Acute Hepatic Necrosis | 0.9                                      | 0.22             | < 0.01 | 0.05            | 0.02             | 0.01   | 0.86            | 0.17             | < 0.01 |
| Metastatic Disease     | -0.45                                    | 0.19             | 0.02   | -0.04           | 0.02             | 0.06   | -0.27           | 0.13             | 0.04   |
| Malignant Neoplasm     | -1.64                                    | 0.1              | < 0.01 | -0.19           | 0.01             | < 0.01 | -1.02           | 0.07             | < 0.01 |
| <u>BMI</u>             | <i>Reference Group: (20, 25]</i>         |                  |        |                 |                  |        |                 |                  |        |
| (0, 20]                | -0.46                                    | 0.12             | < 0.01 | -0.04           | 0.01             | < 0.01 | -0.24           | 0.08             | < 0.01 |
| (25, 30]               | 0.08                                     | 0.07             | 0.21   | 0.01            | 0.01             | 0.02   | 0.03            | 0.05             | 0.48   |
| > 30                   | 0.08                                     | 0.07             | 0.23   | 0.01            | 0.01             | 0.06   | 0.04            | 0.05             | 0.47   |
| <u>Hospitalized</u>    | <i>Reference Group: Not Hospitalized</i> |                  |        |                 |                  |        |                 |                  |        |
| ICU                    | -1.63                                    | 0.18             | < 0.01 | -0.57           | 0.05             | < 0.01 | -0.98           | 0.1              | < 0.01 |
| not ICU                | -1.43                                    | 0.13             | < 0.01 | -0.3            | 0.02             | < 0.01 | -0.56           | 0.06             | < 0.01 |
| <u>Dialysis</u>        | <i>Reference Group: No or Yes</i>        |                  |        |                 |                  |        |                 |                  |        |
| Yes                    | 0.81                                     | 0.15             | < 0.01 | 0.11            | 0.02             | < 0.01 | 0.56            | 0.08             | < 0.01 |

An offset of  $L = 12$  months is applied for log link.

Web Table 2: Estimated covariate effects on RMST in the absence of liver transplantation ( $L = 60$  months)

| $Z_i^P(0)$             | Linear                                   |                  |        | Log             |                  |        | Logistic        |                  |        |
|------------------------|------------------------------------------|------------------|--------|-----------------|------------------|--------|-----------------|------------------|--------|
|                        | $\hat{\beta}_D$                          | ASE <sub>1</sub> | $p$    | $\hat{\beta}_D$ | ASE <sub>1</sub> | $p$    | $\hat{\beta}_D$ | ASE <sub>1</sub> | $p$    |
| Intercept              | 46.91                                    | 0.88             | < 0.01 | 4.03            | 0.03             | 0.06   | 1.84            | 0.09             | < 0.01 |
| Year-2005              | -3.2                                     | 0.07             | < 0.01 | -0.13           | < 0.01           | < 0.01 | -0.32           | 0.01             | < 0.01 |
| Age-50 (Years)         | -0.3                                     | 0.02             | < 0.01 | -0.01           | < 0.01           | < 0.01 | -0.03           | < 0.01           | < 0.01 |
| Sodium-130 (mmol/l)    | 0.66                                     | 0.04             | < 0.01 | 0.03            | < 0.01           | < 0.01 | 0.07            | < 0.01           | < 0.01 |
| MELD Score-6           | -1.19                                    | 0.02             | < 0.01 | -0.06           | < 0.01           | < 0.01 | -0.14           | < 0.01           | < 0.01 |
| <u>UNOS Region</u>     | <i>Reference Group: 5</i>                |                  |        |                 |                  |        |                 |                  |        |
| 1                      | -2.37                                    | 0.78             | < 0.01 | -0.07           | 0.03             | 0.02   | -0.15           | 0.08             | 0.07   |
| 2                      | -1.86                                    | 0.64             | < 0.01 | -0.06           | 0.02             | 0.01   | -0.14           | 0.06             | 0.03   |
| 3                      | -4.36                                    | 0.76             | < 0.01 | -0.13           | 0.03             | < 0.01 | -0.34           | 0.08             | < 0.01 |
| 4                      | 0                                        | 0.63             | 1      | 0.02            | 0.02             | 0.3    | 0.04            | 0.06             | 0.57   |
| 6                      | 0.66                                     | 0.94             | 0.48   | 0.03            | 0.03             | 0.28   | 0.1             | 0.1              | 0.34   |
| 7                      | -0.55                                    | 0.68             | 0.41   | -0.02           | 0.03             | 0.34   | -0.01           | 0.07             | 0.86   |
| 8                      | -1.59                                    | 0.83             | 0.05   | -0.01           | 0.03             | 0.82   | -0.07           | 0.08             | 0.4    |
| 9                      | -1.05                                    | 0.65             | 0.1    | -0.06           | 0.02             | < 0.01 | -0.1            | 0.07             | 0.15   |
| 10                     | -3.94                                    | 0.83             | < 0.01 | -0.14           | 0.03             | < 0.01 | -0.37           | 0.08             | < 0.01 |
| 11                     | -3.46                                    | 0.77             | < 0.01 | -0.13           | 0.03             | < 0.01 | -0.31           | 0.08             | < 0.01 |
| <u>Gender</u>          | <i>Reference Group: Male</i>             |                  |        |                 |                  |        |                 |                  |        |
| Female                 | 0.54                                     | 0.36             | 0.14   | < 0.01          | 0.01             | 0.81   | 0.03            | 0.04             | 0.38   |
| <u>Race</u>            | <i>Reference Group: White</i>            |                  |        |                 |                  |        |                 |                  |        |
| Black                  | -0.99                                    | 0.61             | 0.1    | -0.04           | 0.03             | 0.16   | -0.06           | 0.07             | 0.37   |
| Hispanic               | 0.5                                      | 0.49             | 0.3    | 0.01            | 0.02             | 0.52   | 0.04            | 0.05             | 0.39   |
| Asian                  | 1.63                                     | 0.87             | 0.06   | 0.02            | 0.03             | 0.55   | 0.14            | 0.1              | 0.17   |
| Others                 | -0.86                                    | 1.56             | 0.58   | -0.01           | 0.06             | 0.89   | -0.02           | 0.16             | 0.89   |
| <u>Blood Type</u>      | <i>Reference Group: O</i>                |                  |        |                 |                  |        |                 |                  |        |
| A                      | 0.06                                     | 0.36             | 0.86   | 0.01            | 0.01             | 0.61   | 0.03            | 0.04             | 0.47   |
| B                      | -0.51                                    | 0.59             | 0.38   | -0.01           | 0.02             | 0.44   | -0.04           | 0.06             | 0.54   |
| AB                     | 0.55                                     | 1.07             | 0.61   | 0.01            | 0.04             | 0.8    | 0.03            | 0.13             | 0.81   |
| <u>Diagnosis</u>       | <i>Reference Group: No or Yes</i>        |                  |        |                 |                  |        |                 |                  |        |
| Hepatitis C            | -1.54                                    | 0.54             | < 0.01 | -0.05           | 0.02             | 0.01   | -0.21           | 0.06             | < 0.01 |
| Noncholestatic         | 2.34                                     | 0.55             | < 0.01 | 0.1             | 0.02             | < 0.01 | 0.23            | 0.06             | < 0.01 |
| Cholestatic            | -0.98                                    | 0.77             | 0.2    | -0.04           | 0.03             | 0.08   | -0.15           | 0.08             | 0.07   |
| Acute Hepatic Necrosis | 2.4                                      | 1.5              | 0.11   | 0.01            | 0.04             | 0.84   | 0.1             | 0.15             | 0.51   |
| Metastatic Disease     | -2.58                                    | 1.41             | 0.07   | -0.07           | 0.06             | 0.25   | -0.26           | 0.17             | 0.12   |
| Malignant Neoplasm     | -8.59                                    | 0.69             | < 0.01 | -0.44           | 0.04             | < 0.01 | -0.99           | 0.08             | < 0.01 |
| <u>BMI</u>             | <i>Reference Group: (20, 25]</i>         |                  |        |                 |                  |        |                 |                  |        |
| (0, 20]                | -2.64                                    | 0.86             | < 0.01 | -0.09           | 0.03             | < 0.01 | -0.22           | 0.09             | 0.02   |
| (25, 30]               | -0.15                                    | 0.46             | 0.75   | < 0.01          | 0.02             | 0.8    | -0.03           | 0.05             | 0.59   |
| > 30                   | -0.12                                    | 0.47             | 0.8    | < 0.01          | 0.02             | 0.88   | -0.05           | 0.05             | 0.33   |
| <u>Hospitalized</u>    | <i>Reference Group: Not Hospitalized</i> |                  |        |                 |                  |        |                 |                  |        |
| ICU                    | -1.87                                    | 0.75             | 0.01   | -0.63           | 0.11             | < 0.01 | -0.83           | 0.16             | < 0.01 |
| not ICU                | -1.76                                    | 0.59             | < 0.01 | -0.27           | 0.05             | < 0.01 | -0.36           | 0.09             | < 0.01 |
| <u>Dialysis</u>        | <i>Reference Group: No or Yes</i>        |                  |        |                 |                  |        |                 |                  |        |
| Yes                    | 2.01                                     | 0.77             | 0.01   | 0.13            | 0.05             | 0.01   | 0.47            | 0.11             | < 0.01 |

An offset of  $L = 60$  months is applied for log link.
